# Supplementary material
Source: MDPI journal article supplement (https://www.mdpi.com/1424-8247/15/8/945)
Supplement: s1 [file s1]

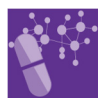

## Supplementary Materials

# Impact of MnTBAP and Baricitinib treatment on Hutchinson-Gilford progeria fibroblasts

Elena Vehns <sup>1</sup>, Rouven Arnold <sup>1</sup> and Karima Djabali <sup>1,\*</sup>

<sup>1</sup> Epigenetics of Aging, Department of Dermatology and Allergy, TUM school of Medicine, Munich Institute of Biomedical Engineering, Technical University of Munich (TUM), 85748 Garching, Germany 1; [djabali@tum.de](mailto:djabali@tum.de)

\* Correspondence: [djabali@tum.de](mailto:djabali@tum.de); Tel.: ++049-089-289-10920

## Supplementary Materials.

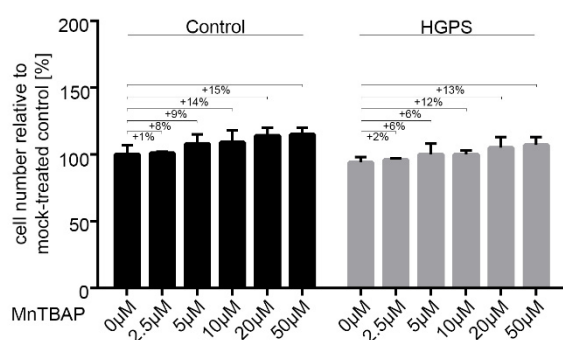

**Figure S1.** Cell cytotoxicity of MnTBAP at different concentrations. The cell numbers of control and HGPS cells after 4 days treatment with a mock and different concentrations of MnTBAP (2.5µm – 50µm) (n =3).

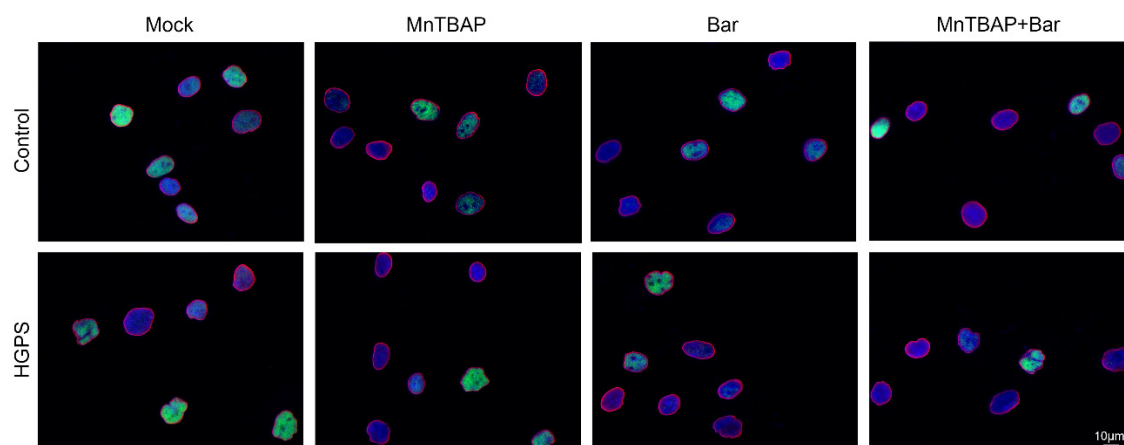

**Figure S2.** Anit-p21-immunostaining in control fibroblasts after treatment with the different regimens. Representative immunofluorescence images of control fibroblasts after 9 d of treatment with a mock solution, 5  $\mu$ M MnTBAP, 1  $\mu$ M Bar or the MnTBAP/Bar combination. The cells were stained with anti-p21 (green) and anti-lamin A/C (red) antibodies and counterstained with DAPI. At least 900 nuclei were counted for each condition. (scale bar 10 $\mu$ m, n=4).

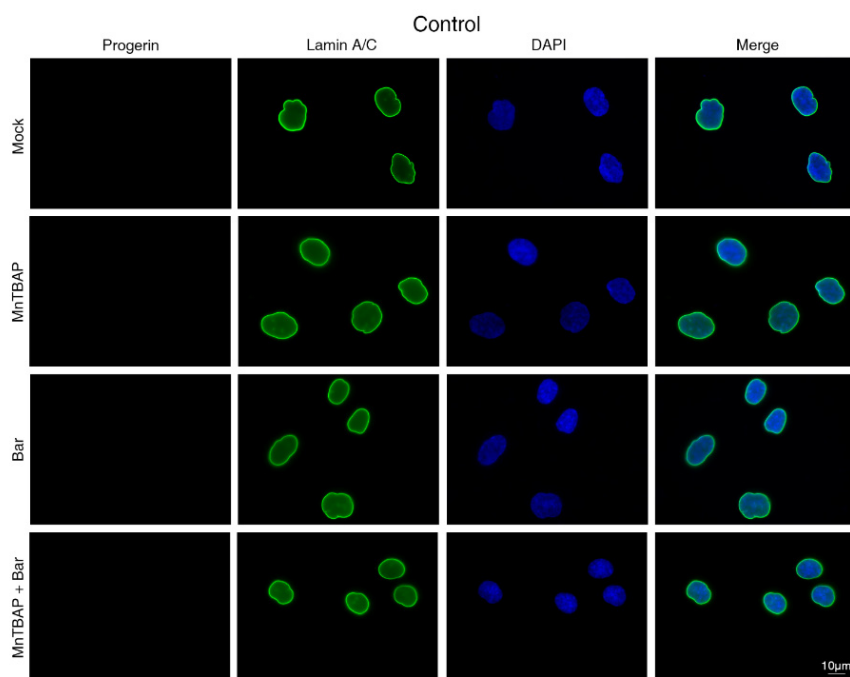

**Figure S3.** Progerin immunostaining in control fibroblasts after the different regimens. Representative immunofluorescence images of control fibroblasts after 9 d of treatment with a mock solution, 5  $\mu$ M MnTBAP, 1  $\mu$ M Bar or the MnTBAP/Bar combination. The cells were stained with anti-progerin (red) and anti-lamin A/C (green) antibodies and counterstained with DAPI (scale bar 10 $\mu$ m, n=4).

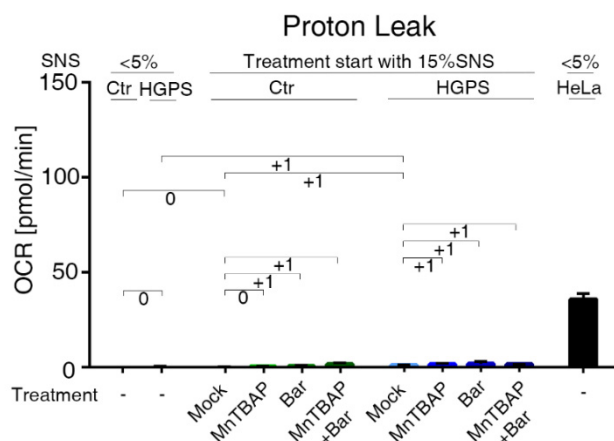

**Figure S4.** Proton leakage measurements. Proton leakage determined using Seahorse XF96 Flux analyzer after treatment of the control and HGPS cells with mock, 5  $\mu$ M MnTBAP, 1  $\mu$ M Bar or with the MnTBAP/Bar combination for 9 d, (n=3).

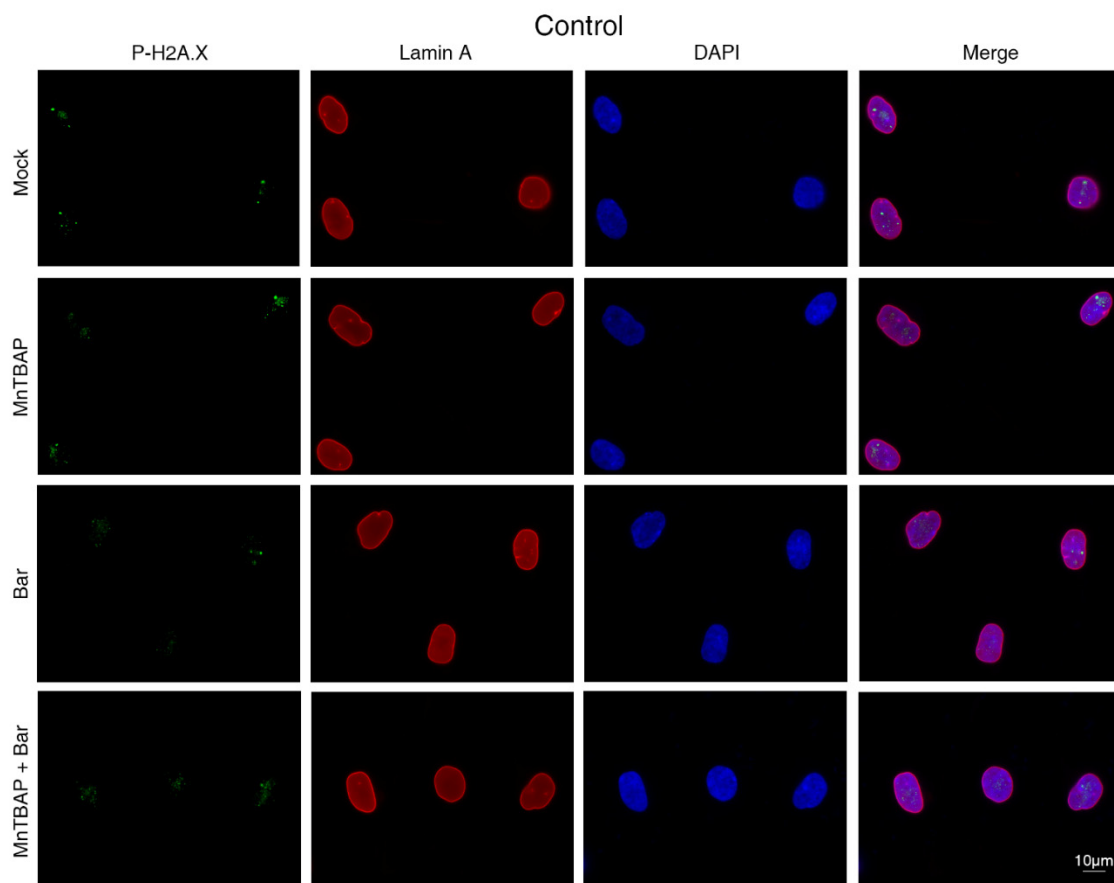

**Figure S5.** p-H2A.X immunostaining in control fibroblasts after treatments. Representative immunofluorescence images of control fibroblasts after 9 d of treatment with a mock solution, 5  $\mu$ M MnTBAP, 1  $\mu$ M Bar or the MnTBAP/Bar combination. The cells were stained with anti-p-Histone H2A.X (Ser139) (green) and anti-lamin A (red) antibodies and counterstained with DAPI (scale bar 10 $\mu$ m, n=4).

### Full-length scan of western blot in Figure 2A

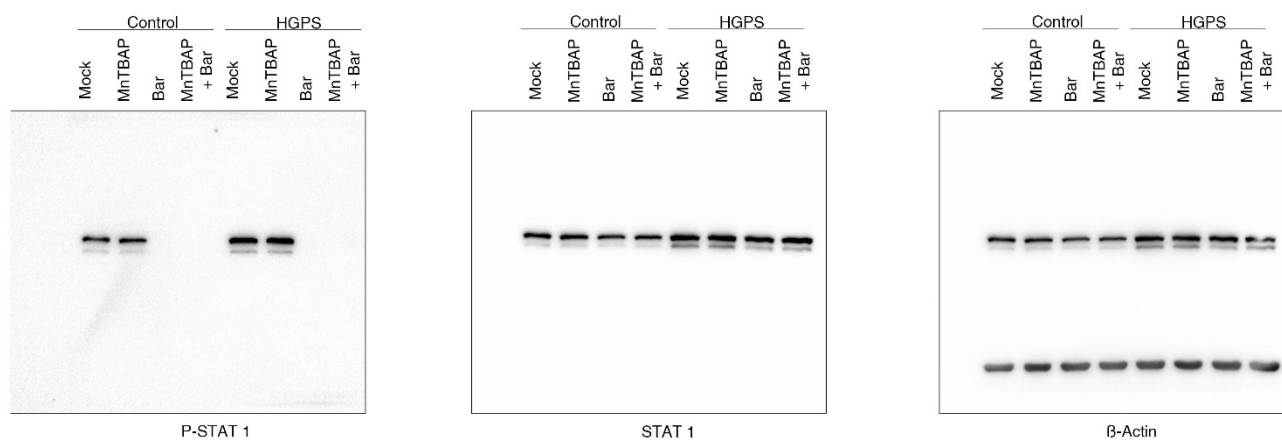

### Full-length scan of western blot in Figure 2B

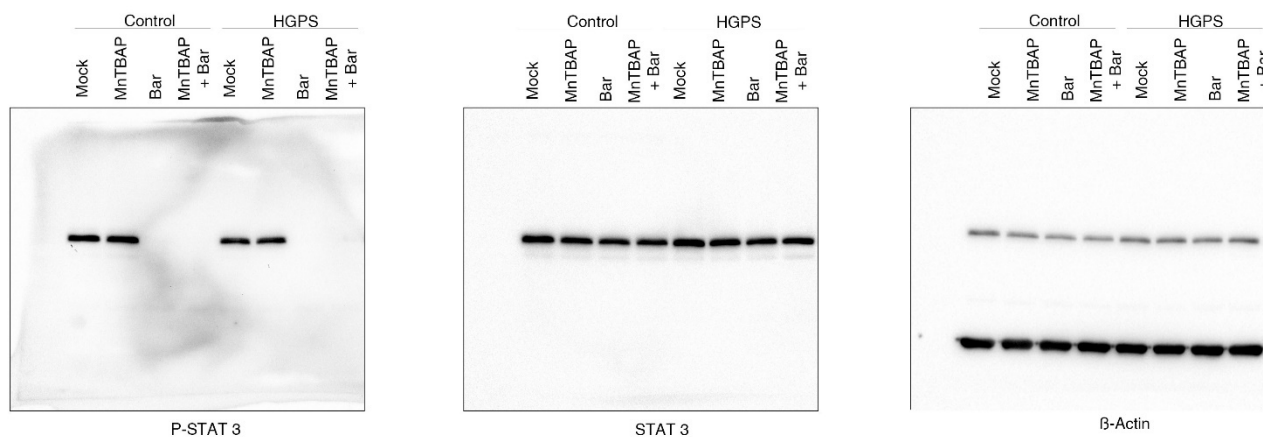

### Full-length scan of western blot in Figure 3A

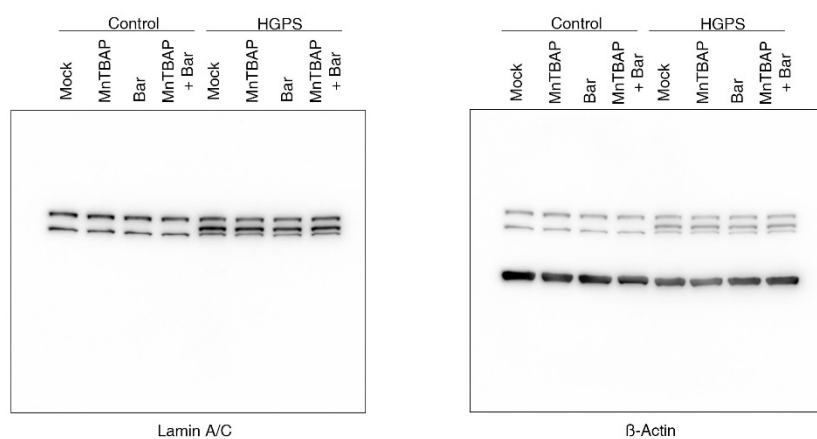

**Figure S6.** Full-length scan of western blots from Figure 2A, 2B, Figure 3A.

| Primer sequence                                                   | Target Gene | Product size (bp) | Melting Temp         | Info                                 |
|-------------------------------------------------------------------|-------------|-------------------|----------------------|--------------------------------------|
| FW:5'-CGCCAATGACTCAGAGGAAGA-3'<br>REV:5'-AGGGCGTCATTCAGGATGAA-3'  | IL-1        | 120               | 59.79 °C<br>59.09 °C | doi.org/10.1371/journal.pone.0002301 |
| FW:5'-AGCATGAAAGTCTCTGCCGC-3'<br>REV:5'-GGCATTGATTGCATCTGGCTG-3'  | CCL2        | 93                | 62.9 °C<br>66.0 °C   | doi.org/10.1172/jci.insight.87023    |
| FW:5'-GGTACATCCTCGACGGCATCT-3'<br>REV:5'-GTGCCTCTTTGCTGCTTTTAC-3' | IL-6        | 81                | 63.6 °C<br>62.4 °C   | doi.org/10.1152/ajpendo.00255.2002   |
| FW:5'-CTGGCCGTGGCTCTCTTG-3'<br>REV:5'-CCTTGGCAAACTGCACCTT-3'      | IL-8        | 69                | 63.2 °C<br>62.5 °C   | doi.org/10.1172/jci.insight.87023    |

**Table S1.** Primers used for real-time quantitative PCR analysis.
